# Supplementary material for: Tradeoff between metabolic i-proteasome addiction and immune evasion in triple-negative breast cancer
Source: Life Sci Alliance. 2020 May 18;3(7):e201900562. doi: 10.26508/lsa.201900562 (PMC7240743; doi:10.26508/lsa.201900562)
Supplement: Supplementary file 4 [file LSA-2019-00562_TableS3.xlsx]

## Sheet: Sheet1
Table-S3: Relationships between tumor expression of PA28b and clinico-pathologic parameters in breast cancer.
		n					% cases			p value#
		total	negative	hetero-geneous	positive		negative	hetero-geneous	positive
Histological type	ductal NOS	254	19	124	111		7.48031	48.8189	43.7008	ns
	lobular/variants	51	7	19	25		13.7255	37.2549	49.0196
	mixed ducto-lob	33	3	20	10		9.09091	60.6061	30.303
	mixed	38	4	17	17		10.5263	44.7368	44.7368
	metaplastic	14	0	12	2		0	85.7143	14.2857
	special types	32	2	18	12		6.25	56.25	37.5
	n	422
Grade	1	58	4	32	22		6.89655	55.1724	37.931	ns
	2	206	20	100	86		9.70874	48.5437	41.7476
	3	159	11	79	69		6.91824	49.6855	43.3962
	n	423
Age	>50 yr	278	26	133	119		9.35252	47.8417	42.8058	ns
	≤50 yr	122	7	66	49		5.7377	54.0984	40.1639
	n	400
Lymph node status	Negative	95	11	47	37		11.5789	49.4737	38.9474	ns
	Positive	95	6	48	41		6.31579	50.5263	43.1579
	n	190
Tumour size	<2 cm	139	12	76	51		8.63309	54.6763	36.6906	ns
	2-5 cm	135	14	70	51		10.3704	51.8519	37.7778
	>5 cm	26	4	14	8		15.3846	53.8462	30.7692
	n	300
Lymphovascular invasion	Absent	330	29	161	140		8.78788	48.7879	42.4242	ns
	Present	93	6	50	37		6.45161	53.7634	39.7849
	n	423
Lymphocytic infiltrate	Absent	162	17	75	70		10.4938	46.2963	43.2099	ns
	Mild	174	13	87	74		7.47126	50	42.5287
	Moderate-severe	86	5	49	32		5.81395	56.9767	37.2093
	n	422
Central scarring/fibrosis	Absent	377	35	188	154		9.28382	49.8674	40.8488	ns
	Present	46	0	23	23		0	50	50
	n	423
Tumour border	infiltrative	357	30	180	147		8.40336	50.4202	41.1765	ns
	pushing	66	5	31	30		7.57576	46.9697	45.4545
	n	423
Ki67 expression (20% threshold)	Low	345	25	168	152		7.24638	48.6957	44.058	ns
	High	59	8	33	18		13.5593	55.9322	30.5085
	n	404
HER2 status (CISH)	Negative	371	31	189	151		8.3558	50.9434	40.7008	ns
	Positive	53	4	23	26		7.54717	43.3962	49.0566
	n	424
ER status	Positive	103	12	52	39		11.6505	50.4854	37.8641	ns
	Negative	318	23	158	137		7.2327	49.6855	43.0818
	n	421
TN status	Non-TNBC	346	26	170	150		7.51445	49.1329	43.3526	ns
	TNBC	76	9	41	26		11.8421	53.9474	34.2105
	n	422
Other prognostic subgroups	HER2+	53	4	23	26		7.54717	43.3962	49.0566	ns
	HR+/HER2-neg (Ki67-low)	254	18	128	108		7.08661	50.3937	42.5197
	HR+/HER2-neg (Ki67-high)	24	3	14	7		12.5	58.3333	29.1667
	TN (basal-like)	58	5	34	19		8.62069	58.6207	32.7586
	TN (non-basal)	16	4	7	5		25	43.75	31.25
	n	405
#Chi-square test
